# Supplementary material for: Sea ice-associated algae and zooplankton fecal pellets fuel organic particle export in the seasonally ice-covered northwest Labrador Sea
Source: Copernicus journal article supplement (doi:10.5194/egusphere-2024-3265), 2024-10-22
Supplement: Supplementary file [file egusphere-2024-3265-supplement.pdf]

# Sea ice-associated algae and zooplankton fecal pellets fuel organic particle export in the seasonally ice-covered northwest Labrador Sea

5 Shao-Min Chen<sup>1</sup>, Thibaud Dezutter<sup>2</sup>, David Cote<sup>3</sup>, Catherine Lalande<sup>2</sup>, Evan Edinger<sup>4</sup>, Owen A. Sherwood<sup>1</sup>

<sup>1</sup>Department of Earth and Environmental Sciences, Dalhousie University, Halifax, Nova Scotia, Canada

<sup>2</sup>Amundsen Science, Université Laval, Québec City, Québec, Canada

<sup>3</sup>Fisheries and Oceans Canada, Northwest Atlantic Fisheries Centre, St. John's, Newfoundland and Labrador, Canada

10 <sup>4</sup>Department of Geography, Memorial University of Newfoundland, St. John's, Newfoundland and Labrador, Canada

*Correspondence to:* Shao-Min Chen ([Shaomin.Chen@dal.ca](mailto:Shaomin.Chen@dal.ca))

Supplementary Tables and Figures

15 Table S1 Sampling date and depth, fluxes, and bulk  $\delta^{13}\text{C}$  and  $\delta^{15}\text{N}$  of sinking particles from SB-500 (469 m) and SB-1000 (915 m) sediment traps. TPM, total particulate matter; POC, particulate organic carbon; PN, particulate nitrogen.

| Sample ID | Depth<br>(m) | Date open<br>(mm/dd/yyyy) | Date close<br>(mm/dd/yyyy) | TPM<br>(mg m <sup>-2</sup> d <sup>-1</sup> ) | POC<br>(mg C m <sup>-2</sup> d <sup>-1</sup> ) | PN<br>(mg N m <sup>-2</sup> d <sup>-1</sup> ) | C:N ratio | Bulk $\delta^{13}\text{C}$<br>(‰) | Bulk $\delta^{15}\text{N}$<br>(‰) |
|-----------|--------------|---------------------------|----------------------------|----------------------------------------------|------------------------------------------------|-----------------------------------------------|-----------|-----------------------------------|-----------------------------------|
| HB17-A3   | 469          | 11/16/2017                | 12/1/2017                  | 981.6                                        | 19.3                                           | 2.8                                           | 6.9       | -25.3                             | 6.8                               |
| HB17-A4   | 469          | 12/1/2017                 | 12/16/2017                 | 1116.4                                       | 22.2                                           | 3.2                                           | 6.9       | -25.3                             | 6.8                               |
| HB17-A5   | 469          | 12/16/2017                | 1/1/2018                   | 590.9                                        | 14.3                                           | 2.4                                           | 6.0       | -24.7                             | 7.5                               |
| HB17-A6   | 469          | 1/1/2018                  | 1/16/2018                  | 1006.9                                       | 12.9                                           | 1.8                                           | 7.2       | -24.6                             | 7.0                               |
| HB17-A7   | 469          | 1/16/2018                 | 1/31/2018                  | 602.8                                        | 10.6                                           | 1.5                                           | 7.0       | -25.0                             | 7.2                               |
| HB17-A8   | 469          | 1/31/2018                 | 2/15/2018                  | 785.0                                        | 15.1                                           | 1.9                                           | 7.9       | -25.6                             | 6.3                               |
| HB17-A9   | 469          | 2/15/2018                 | 3/3/2018                   | 448.5                                        | 10.5                                           | 1.5                                           | 7.1       | NA                                | 6.7                               |
| HB17-A10  | 469          | 3/3/2018                  | 3/18/2018                  | 178.6                                        | 5.7                                            | 0.9                                           | 6.3       | -24.6                             | 7.2                               |
| HB17-A11  | 469          | 3/18/2018                 | 4/3/2018                   | 379.4                                        | 7.9                                            | 1.2                                           | 6.7       | NA                                | 7.7                               |
| HB17-A12  | 469          | 4/3/2018                  | 4/17/2018                  | 294.5                                        | 7.3                                            | 1.0                                           | 7.8       | -25.4                             | 8.1                               |
| HB17-A13  | 469          | 4/17/2018                 | 5/1/2018                   | 383.8                                        | 8.6                                            | 1.3                                           | 6.8       | NA                                | 6.3                               |
| HB17-A14  | 469          | 5/1/2018                  | 5/16/2018                  | 132.1                                        | 4.6                                            | 0.7                                           | 7.1       | -24.9                             | 6.3                               |
| HB17-A15  | 469          | 5/16/2018                 | 6/1/2018                   | 284.7                                        | 12.5                                           | 1.9                                           | 6.6       | -24.3                             | 5.9                               |
| HB17-A16  | 469          | 6/1/2018                  | 6/16/2018                  | 85.9                                         | 4.3                                            | 0.6                                           | 6.8       | -23.8                             | 5.6                               |
| HB17-A17  | 469          | 6/16/2018                 | 7/1/2018                   | 139.3                                        | 5.3                                            | 0.9                                           | 6.0       | -25.8                             | 6.1                               |
| HB17-A18  | 469          | 7/1/2018                  | 7/16/2018                  | 167.2                                        | 4.4                                            | 0.7                                           | 6.6       | -24.8                             | 9.3                               |
| HB18-A1   | 915          | 8/3/2018                  | 8/19/2018                  | 242.8                                        | 8.4                                            | 1.3                                           | 6.4       | NA                                | NA                                |
| HB18-A2   | 915          | 8/19/2018                 | 9/3/2018                   | 248.5                                        | 9.3                                            | 1.4                                           | 6.9       | -25.9                             | NA                                |
| HB18-A3   | 915          | 9/3/2018                  | 9/18/2018                  | 586.6                                        | 16.3                                           | 2.3                                           | 7.0       | -25.0                             | 8.6                               |
| HB18-A4   | 915          | 9/18/2018                 | 10/3/2018                  | 1084.6                                       | 23.7                                           | 3.3                                           | 7.2       | -25.2                             | 6.0                               |
| HB18-A5   | 915          | 10/3/2018                 | 10/19/2018                 | 1435.9                                       | 30.4                                           | 4.2                                           | 7.2       | -25.0                             | 6.7                               |
| HB18-A6   | 915          | 10/19/2018                | 11/3/2018                  | 718.9                                        | 18.8                                           | 2.8                                           | 6.7       | -25.4                             | NA                                |
| HB18-A7   | 915          | 11/3/2018                 | 11/18/2018                 | 1180.7                                       | 25.2                                           | 3.8                                           | 6.6       | -25.5                             | 6.7                               |

| <b>Sample ID</b> | <b>Depth<br/>(m)</b> | <b>Date open<br/>(mm/dd/yyyy)</b> | <b>Date close<br/>(mm/dd/yyyy)</b> | <b>TPM<br/>(mg m<sup>-2</sup> d<sup>-1</sup>)</b> | <b>POC<br/>(mg C m<sup>-2</sup> d<sup>-1</sup>)</b> | <b>PN<br/>(mg N m<sup>-2</sup> d<sup>-1</sup>)</b> | <b>C:N ratio</b> | <b>Bulk δ<sup>13</sup>C<br/>(‰)</b> | <b>Bulk δ<sup>15</sup>N<br/>(‰)</b> |
|------------------|----------------------|-----------------------------------|------------------------------------|---------------------------------------------------|-----------------------------------------------------|----------------------------------------------------|------------------|-------------------------------------|-------------------------------------|
| HB18-A8          | 915                  | 11/18/2018                        | 12/3/2018                          | 797.9                                             | 16.8                                                | 2.4                                                | 7.1              | -25.1                               | NA                                  |
| HB18-A9          | 915                  | 12/3/2018                         | 12/19/2018                         | 282.2                                             | 9.9                                                 | 1.5                                                | 6.5              | -25.4                               | 7.6                                 |
| HB18-A10         | 915                  | 12/19/2018                        | 1/3/2019                           | 209.6                                             | 5.2                                                 | 0.8                                                | 6.4              | -26.0                               | NA                                  |
| HB18-A11         | 915                  | 1/3/2019                          | 1/19/2019                          | 1029.1                                            | 22.9                                                | 3.6                                                | 6.3              | -24.6                               | 7.5                                 |
| HB18-A12         | 915                  | 1/19/2019                         | 2/2/2019                           | 222.9                                             | 5.9                                                 | 1.0                                                | 6.1              | -26.6                               | NA                                  |
| HB18-A13         | 915                  | 2/2/2019                          | 2/16/2019                          | 630.5                                             | 11.4                                                | 1.7                                                | 6.7              | -25.1                               | 6.9                                 |
| HB18-A14         | 915                  | 2/16/2019                         | 3/3/2019                           | 1711.2                                            | 24.5                                                | 3.6                                                | 6.8              | -24.8                               | 7.1                                 |
| HB18-A15         | 915                  | 3/3/2019                          | 3/19/2019                          | 2383.3                                            | 28.4                                                | 4.2                                                | 6.8              | -24.5                               | 7.8                                 |
| HB18-A16         | 915                  | 3/19/2019                         | 4/3/2019                           | 3017.3                                            | 32.0                                                | 4.3                                                | 7.5              | -24.8                               | 7.2                                 |
| HB18-A17         | 915                  | 4/3/2019                          | 4/18/2019                          | 883.9                                             | 13.4                                                | 1.9                                                | 7.0              | -24.9                               | NA                                  |
| HB18-A18         | 915                  | 4/18/2019                         | 5/3/2019                           | 1360.2                                            | 19.3                                                | 2.8                                                | 6.8              | -25.0                               | NA                                  |
| HB18-A19         | 915                  | 5/3/2019                          | 5/19/2019                          | 2241.3                                            | 28.4                                                | 4.2                                                | 6.8              | -24.7                               | 4.5                                 |
| HB18-A20         | 915                  | 5/19/2019                         | 6/3/2019                           | 2783.7                                            | 35.1                                                | 5.2                                                | 6.8              | -24.9                               | 5.3                                 |
| HB18-A21         | 915                  | 6/3/2019                          | 6/18/2019                          | 2036.5                                            | 28.4                                                | 4.1                                                | 6.9              | -25.2                               | 6.5                                 |

**Table S2  $\delta^{13}\text{C}$ -AA values of sinking particles from SB-500 (469 m) and SB-1000 (915 m) sediment traps, and copepod and detritus samples.**

| <b>Sample ID</b> | <b>Depth<br/>(m)</b> | <b>Date open<br/>(mm/dd/yyyy)</b> | <b>Date close<br/>(mm/dd/yyyy)</b> | <b>Phe<br/>(‰)</b> | <b>Thr<br/>(‰)</b> | <b>Ile<br/>(‰)</b> | <b>Leu<br/>(‰)</b> | <b>Val<br/>(‰)</b> | <b>Asx<br/>(‰)</b> | <b>Glx<br/>(‰)</b> | <b>Pro<br/>(‰)</b> | <b>Ala<br/>(‰)</b> | <b>Gly<br/>(‰)</b> | <b>Lys<br/>(‰)</b> |
|------------------|----------------------|-----------------------------------|------------------------------------|--------------------|--------------------|--------------------|--------------------|--------------------|--------------------|--------------------|--------------------|--------------------|--------------------|--------------------|
| HB17-C1          | 469                  | 11/16/2017                        | 12/1/2017                          | 7.0                | -2.6               | 10.9               | 12.7               | 17.0               | 13.6               | 17.0               | 17.6               | 16.1               | 6.1                | 11.5               |
| HB17-C2          | 469                  | 12/1/2017                         | 12/16/2017                         | 7.4                | -1.0               | NA                 | 12.6               | NA                 | 13.1               | 16.8               | 16.7               | 16.3               | 6.9                | 8.8                |
| HB17-C4          | 469                  | 1/31/2018                         | 3/3/2018                           | 6.6                | NA                 | 14.6               | 13.8               | 18.3               | 13.7               | 17.0               | 17.8               | 18.2               | 8.1                | 4.5                |
| HB17-C5          | 469                  | 3/18/2018                         | 4/3/2018                           | 6.9                | -3.4               | 12.1               | 12.4               | 15.1               | 12.7               | 16.4               | 17.7               | 16.5               | 6.6                | 8.6                |
| HB17-C6          | 469                  | 4/3/2018                          | 5/1/2018                           | 6.5                | -4.0               | 13.7               | 12.8               | 17.7               | 13.1               | 16.8               | 17.1               | 17.0               | 6.6                | 6.5                |
| HB17-C7          | 469                  | 5/16/2018                         | 6/1/2018                           | 5.2                | -2.4               | 9.5                | 8.3                | 13.4               | 10.8               | 14.7               | 10.8               | 13.2               | 4.5                | -0.6               |
| HB18-C1          | 915                  | 8/3/2018                          | 9/18/2018                          | 6.5                | -4.8               | 15.7               | 14.7               | 18.5               | 13.7               | 17.7               | 16.7               | 18.9               | 6.9                | 5.5                |
| HB18-C2          | 915                  | 9/18/2018                         | 10/3/2018                          | 6.7                | -3.5               | 10.8               | 11.6               | 15.5               | 14.0               | 17.1               | 16.7               | 16.6               | 6.5                | 7.7                |
| HB18-C3          | 915                  | 10/19/2018                        | 11/3/2018                          | 6.0                | -3.4               | 11.8               | 12.1               | 15.2               | 12.8               | 17.0               | 16.5               | 16.5               | 6.4                | 8.0                |
| HB18-C4          | 915                  | 11/18/2018                        | 12/3/2018                          | 6.7                | -2.6               | 12.3               | 12.8               | 17.1               | 12.9               | 16.9               | 16.6               | 17.3               | 6.6                | 6.8                |
| HB18-C5          | 915                  | 1/3/2019                          | 1/19/2019                          | 7.4                | -4.9               | 12.9               | 14.8               | 18.5               | 14.6               | 18.3               | 22.0               | 19.0               | 7.1                | 12.3               |
| HB18-C6          | 915                  | 2/16/2019                         | 3/3/2019                           | 8.0                | -1.7               | NA                 | 12.7               | 9.2                | 13.4               | 17.2               | 16.2               | 17.2               | 6.8                | 8.9                |
| HB18-C7          | 915                  | 3/3/2019                          | 3/19/2019                          | 7.4                | NA                 | NA                 | 12.6               | 17.0               | 13.9               | 16.3               | 15.3               | 17.3               | 6.3                | 6.9                |
| HB18-C8          | 915                  | 3/19/2019                         | 4/3/2019                           | 6.8                | NA                 | 12.2               | 12.2               | 15.6               | 12.5               | 16.0               | 14.5               | 17.7               | 6.7                | -1.8               |
| HB18-C9          | 915                  | 4/3/2019                          | 4/18/2019                          | 6.7                | -4.1               | NA                 | 13.3               | 11.8               | 13.5               | 16.9               | 16.6               | 17.8               | 5.8                | 8.8                |
| HB18-C11         | 915                  | 5/3/2019                          | 5/19/2019                          | 6.8                | NA                 | 10.1               | 10.6               | 14.3               | 12.7               | 14.7               | 13.8               | 14.6               | 7.0                | 5.4                |
| HB18-C12         | 915                  | 5/19/2019                         | 6/3/2019                           | 5.9                | NA                 | NA                 | 8.5                | 13.8               | 11.6               | 14.6               | 12.7               | 15.0               | 5.3                | 8.2                |

**Table S3  $\delta^{15}\text{N}$ -AA values of sinking particles from SB-500 (469 m) and SB-1000 (915 m) sediment traps, and copepod and detritus samples.**

| <b>Sample ID</b> | <b>Depth<br/>(m)</b> | <b>Date open<br/>(mm/dd/yyyy)</b> | <b>Date close<br/>(mm/dd/yyyy)</b> | <b>Phe<br/>(‰)</b> | <b>Thr<br/>(‰)</b> | <b>Ile<br/>(‰)</b> | <b>Leu<br/>(‰)</b> | <b>Val<br/>(‰)</b> | <b>Asx<br/>(‰)</b> | <b>Glx<br/>(‰)</b> | <b>Pro<br/>(‰)</b> | <b>Ala<br/>(‰)</b> | <b>Gly<br/>(‰)</b> | <b>Lys<br/>(‰)</b> |
|------------------|----------------------|-----------------------------------|------------------------------------|--------------------|--------------------|--------------------|--------------------|--------------------|--------------------|--------------------|--------------------|--------------------|--------------------|--------------------|
| HB17-C1          | 469                  | 11/16/2017                        | 12/1/2017                          | 7.0                | -2.6               | 10.9               | 12.7               | 17.0               | 13.6               | 17.0               | 17.6               | 16.1               | 6.1                | 11.5               |
| HB17-C2          | 469                  | 12/1/2017                         | 12/16/2017                         | 7.4                | -1.0               | NA                 | 12.6               | NA                 | 13.1               | 16.8               | 16.7               | 16.3               | 6.9                | 8.8                |
| HB17-C4          | 469                  | 1/31/2018                         | 3/3/2018                           | 6.6                | NA                 | 14.6               | 13.8               | 18.3               | 13.7               | 17.0               | 17.8               | 18.2               | 8.1                | 4.5                |
| HB17-C5          | 469                  | 3/18/2018                         | 4/3/2018                           | 6.9                | -3.4               | 12.1               | 12.4               | 15.1               | 12.7               | 16.4               | 17.7               | 16.5               | 6.6                | 8.6                |
| HB17-C6          | 469                  | 4/3/2018                          | 5/1/2018                           | 6.5                | -4.0               | 13.7               | 12.8               | 17.7               | 13.1               | 16.8               | 17.1               | 17.0               | 6.6                | 6.5                |
| HB17-C7          | 469                  | 5/16/2018                         | 6/1/2018                           | 5.2                | -2.4               | 9.5                | 8.3                | 13.4               | 10.8               | 14.7               | 10.8               | 13.2               | 4.5                | -0.6               |
| HB18-C1          | 915                  | 8/3/2018                          | 9/18/2018                          | 6.5                | -4.8               | 15.7               | 14.7               | 18.5               | 13.7               | 17.7               | 16.7               | 18.9               | 6.9                | 5.5                |
| HB18-C2          | 915                  | 9/18/2018                         | 10/3/2018                          | 6.7                | -3.5               | 10.8               | 11.6               | 15.5               | 14.0               | 17.1               | 16.7               | 16.6               | 6.5                | 7.7                |
| HB18-C3          | 915                  | 10/19/2018                        | 11/3/2018                          | 6.0                | -3.4               | 11.8               | 12.1               | 15.2               | 12.8               | 17.0               | 16.5               | 16.5               | 6.4                | 8.0                |
| HB18-C4          | 915                  | 11/18/2018                        | 12/3/2018                          | 6.7                | -2.6               | 12.3               | 12.8               | 17.1               | 12.9               | 16.9               | 16.6               | 17.3               | 6.6                | 6.8                |
| HB18-C5          | 915                  | 1/3/2019                          | 1/19/2019                          | 7.4                | -4.9               | 12.9               | 14.8               | 18.5               | 14.6               | 18.3               | 22.0               | 19.0               | 7.1                | 12.3               |
| HB18-C6          | 915                  | 2/16/2019                         | 3/3/2019                           | 8.0                | -1.7               | NA                 | 12.7               | 9.2                | 13.4               | 17.2               | 16.2               | 17.2               | 6.8                | 8.9                |
| HB18-C7          | 915                  | 3/3/2019                          | 3/19/2019                          | 7.4                | NA                 | NA                 | 12.6               | 17.0               | 13.9               | 16.3               | 15.3               | 17.3               | 6.3                | 6.9                |
| HB18-C8          | 915                  | 3/19/2019                         | 4/3/2019                           | 6.8                | NA                 | 12.2               | 12.2               | 15.6               | 12.5               | 16.0               | 14.5               | 17.7               | 6.7                | -1.8               |
| HB18-C9          | 915                  | 4/3/2019                          | 4/18/2019                          | 6.7                | -4.1               | NA                 | 13.3               | 11.8               | 13.5               | 16.9               | 16.6               | 17.8               | 5.8                | 8.8                |
| HB18-C11         | 915                  | 5/3/2019                          | 5/19/2019                          | 6.8                | NA                 | 10.1               | 10.6               | 14.3               | 12.7               | 14.7               | 13.8               | 14.6               | 7.0                | 5.4                |
| HB18-C12         | 915                  | 5/19/2019                         | 6/3/2019                           | 5.9                | NA                 | NA                 | 8.5                | 13.8               | 11.6               | 14.6               | 12.7               | 15.0               | 5.3                | 8.2                |
| Detritus1        | 200                  | -                                 | -                                  | 4.2                | -2.2               | 8.2                | 6.1                | 13.0               | 9.4                | 13.3               | 9.3                | 11.7               | 3.4                | 2.6                |
| Detritus2        | 200                  | -                                 | -                                  | 5.8                | 1.9                | 7.6                | 5.4                | 13.3               | 8.5                | 11.8               | 7.8                | 11.5               | 6.3                | 3.5                |
| Detritus3        | 200                  | -                                 | -                                  | 7.1                | 3.0                | 9.8                | 7.2                | 14.9               | 9.8                | 13.1               | 9.3                | 12.4               | 7.1                | 4.8                |
| Copepod1         | 200                  | -                                 | -                                  | 4.3                | -3.8               | 12.7               | 10.3               | 15.8               | 14.1               | 17.5               | 15.9               | 19.6               | 6.3                | 3.1                |
| Copepod2         | 200                  | -                                 | -                                  | 5.5                | -4.5               | 13.8               | 11.3               | 17.0               | 14.7               | 17.9               | 16.3               | 19.4               | 6.3                | 4.0                |
| Copepod3         | 200                  | -                                 | -                                  | 5.4                | -3.3               | 13.2               | 11.1               | 16.0               | 13.7               | 17.3               | 15.7               | 18.2               | 5.2                | 2.9                |

**Table S4 Principal component analysis output for Fig. 4a.**

| <b>Importance of components</b> |       |       |       |       |       |
|---------------------------------|-------|-------|-------|-------|-------|
|                                 | PC1   | PC2   | PC3   | PC4   | PC5   |
| Eigenvalue                      | 1.83  | 1.49  | 0.91  | 0.78  | 0.00  |
| Cumulative portion              | 0.37  | 0.66  | 0.84  | 1.00  | 1.00  |
| <b>Vector scores</b>            |       |       |       |       |       |
|                                 | PC1   | PC2   | PC3   | PC4   | PC5   |
| Phe                             | -0.50 | 0.03  | -0.38 | 0.72  | 0.28  |
| Leu                             | 0.57  | 0.38  | -0.45 | -0.08 | 0.57  |
| Thr                             | 0.23  | -0.73 | 0.33  | 0.15  | 0.54  |
| Ile                             | -0.59 | -0.06 | -0.14 | -0.66 | 0.44  |
| Val                             | -0.12 | 0.57  | 0.72  | 0.14  | 0.34  |
| <b>Sample scores</b>            |       |       |       |       |       |
| Sample ID                       | PC1   | PC2   | PC3   | PC4   | Group |
| HB17-C2                         | 0.63  | -0.63 | 0.16  | 1.53  | 469m  |
| HB17-C5                         | 0.48  | 2.19  | 1.02  | 0.39  | 469m  |
| HB17-C6                         | 2.53  | -1.24 | 0.52  | -0.21 | 469m  |
| HB17-C7                         | 0.27  | -0.31 | -1.88 | 0.39  | 469m  |
| HB18-C1                         | 0.59  | 2.79  | 0.43  | -0.81 | 915m  |
| HB18-C2                         | 0.68  | 2.21  | 1.61  | 1.13  | 915m  |
| HB18-C3                         | 1.80  | 0.02  | 1.14  | 0.57  | 915m  |
| HB18-C4                         | 2.13  | -1.59 | 0.08  | -0.30 | 915m  |
| HB18-C5                         | 2.45  | 2.02  | -2.30 | -0.26 | 915m  |
| HB18-C6                         | 0.95  | -1.06 | -1.00 | 0.56  | 915m  |
| HB18-C7                         | 1.29  | -1.04 | 1.12  | -0.68 | 915m  |
| HB18-C8                         | 0.50  | 1.75  | -0.30 | 0.08  | 915m  |
| HB18-C9                         | 0.93  | 0.39  | 1.31  | 1.62  | 915m  |
| HB18-C12                        | -0.89 | -1.03 | 0.26  | 0.48  | 915m  |

**Sample scores**

| Sample ID  | PC1   | PC2   | PC3   | PC4   | Group         |
|------------|-------|-------|-------|-------|---------------|
| ICEp1      | 1.48  | -0.76 | -1.97 | 0.05  | Sea ice algae |
| ICEp2      | 0.63  | 1.31  | -1.71 | -0.11 | Sea ice algae |
| ICEn1      | 1.24  | 1.67  | 1.67  | -1.77 | Sea ice algae |
| ICEn2      | 0.42  | 0.24  | 0.09  | 0.27  | Sea ice algae |
| ICEn3      | 0.28  | 1.68  | -0.63 | -0.71 | Sea ice algae |
| ICEn1b     | 1.84  | 0.05  | -0.30 | 0.22  | Sea ice algae |
| ICEn3b     | 0.58  | -0.70 | 0.09  | 0.50  | Sea ice algae |
| ICEn2b     | 0.52  | -0.86 | 0.25  | 0.99  | Sea ice algae |
| CF-Sp1     | -2.43 | -1.25 | -0.98 | -0.17 | Sea ice algae |
| CF-Sm1     | -0.22 | 0.10  | -0.17 | -1.02 | Sea ice algae |
| SF-Sp1     | -0.40 | 0.47  | -0.92 | -2.06 | Sea ice algae |
| SF-Sm1     | -0.19 | -0.20 | -1.04 | -0.46 | Sea ice algae |
| NS3L-0-N   | -1.22 | -0.14 | 0.93  | -0.68 | Pelagic algae |
| NS3L-0.5-N | -0.81 | -0.34 | 0.17  | -0.06 | Pelagic algae |
| NS3L-1-N   | -1.15 | 0.13  | 0.20  | -0.71 | Pelagic algae |
| NS3L-0-P   | -2.73 | 0.71  | -0.29 | 0.37  | Pelagic algae |
| NS3L-0.5-P | -2.17 | 0.25  | 0.82  | -0.47 | Pelagic algae |
| NS3L-1-P   | -2.06 | -0.26 | -0.55 | -0.72 | Pelagic algae |
| 1-15-1-N   | -0.42 | -0.29 | -0.11 | 0.77  | Pelagic algae |
| 1-15-0.5-P | -0.01 | -1.55 | 0.67  | 0.31  | Pelagic algae |
| 1-15-0-N   | -0.54 | 0.45  | -0.35 | 0.58  | Pelagic algae |
| 1-15-1-P   | -3.09 | 1.37  | 0.33  | 1.63  | Pelagic algae |
| CF1-Pp1    | -0.98 | -1.49 | 0.09  | 1.09  | Pelagic algae |
| CF1-Pm1    | 0.50  | -0.02 | -0.50 | 1.08  | Pelagic algae |
| CF0-Pp1    | -1.45 | -0.74 | -0.76 | -0.04 | Pelagic algae |
| CF0-Pm1    | -0.38 | -0.97 | -0.34 | 0.80  | Pelagic algae |
| SF1-Pp1    | -0.95 | 0.00  | -0.17 | -1.03 | Pelagic algae |
| SF1-Pm1    | 0.65  | -0.94 | 1.58  | -0.42 | Pelagic algae |
| SF0-Pp1    | 0.45  | -3.15 | 0.83  | -1.94 | Pelagic algae |
| SF0-Pm1    | -1.74 | 0.75  | 0.88  | -0.81 | Pelagic algae |

**Table S5 Median proportions of phytoplankton, degraded OM, fecal pellets and zooplankton in sinking particles from SB-500 (469 m) and SB-1000 (915 m) sediment traps, copepods, and phytodetritus from a four end-member Bayesian mixing model based on Phe-normalized  $\delta^{15}\text{N}$  of Ala and Thr.**

| Sample ID | Depth (m) | Date open (yyyy-mm-dd) | Date close (mm/dd/yyyy) | Phytoplankton (%) | Degraded OM (%) | Fecal pellets (%) | Zooplankton (%) |
|-----------|-----------|------------------------|-------------------------|-------------------|-----------------|-------------------|-----------------|
| HB17-C1   | 469       | 11/16/2017             | 12/1/2017               | 6%                | 1%              | 81%               | 7%              |
| HB17-C2   | 469       | 12/1/2017              | 12/16/2017              | 14%               | 1%              | 70%               | 10%             |
| HB17-C5   | 469       | 3/18/2018              | 4/3/2018                | 3%                | 1%              | 85%               | 7%              |
| HB17-C6   | 469       | 4/3/2018               | 5/1/2018                | 3%                | 1%              | 82%               | 11%             |
| HB17-C7   | 469       | 5/16/2018              | 6/1/2018                | 22%               | 1%              | 65%               | 8%              |
| HB18-C2   | 915       | 9/18/2018              | 10/3/2018               | 3%                | 1%              | 83%               | 9%              |
| HB18-C3   | 915       | 10/19/2018             | 11/3/2018               | 5%                | 1%              | 73%               | 17%             |
| HB18-C4   | 915       | 11/18/2018             | 12/3/2018               | 5%                | 1%              | 70%               | 19%             |
| HB18-C5   | 915       | 1/3/2019               | 1/19/2019               | 1%                | 0%              | 88%               | 8%              |
| HB18-C6   | 915       | 2/16/2019              | 3/3/2019                | 6%                | 1%              | 81%               | 8%              |
| HB18-C9   | 915       | 4/3/2019               | 4/18/2019               | 2%                | 1%              | 80%               | 15%             |
| Detritus1 | 200       | -                      | -                       | 31%               | 1%              | 54%               | 10%             |
| Detritus2 | 200       | -                      | -                       | 54%               | 1%              | 33%               | 10%             |
| Detritus3 | 200       | -                      | -                       | 55%               | 1%              | 35%               | 8%              |
| Copepod1  | 200       | -                      | -                       | 2%                | 1%              | 8%                | 87%             |
| Copepod2  | 200       | -                      | -                       | 2%                | 1%              | 27%               | 69%             |
| Copepod3  | 200       | -                      | -                       | 4%                | 1%              | 37%               | 56%             |



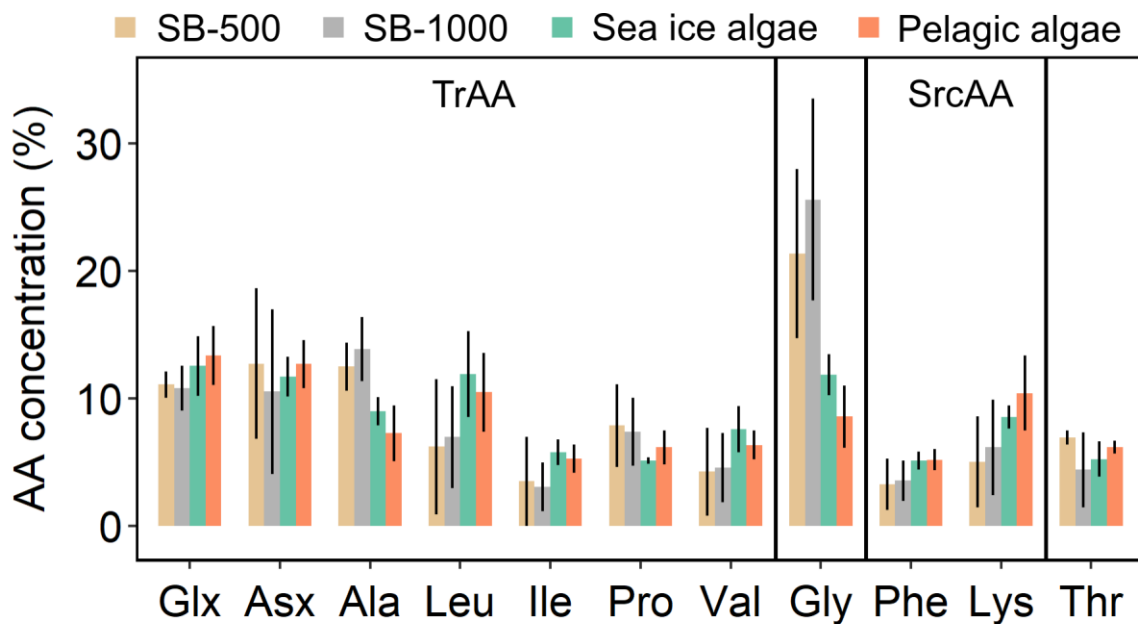

40 Figure S1 The AA molar composition of sinking particles from SB-500 and SB-1000 sediment traps, sea ice algae, and pelagic algae. Error bars represent  $\pm 1$  s.d. of averages of samples ( $n = 5-18$ ).

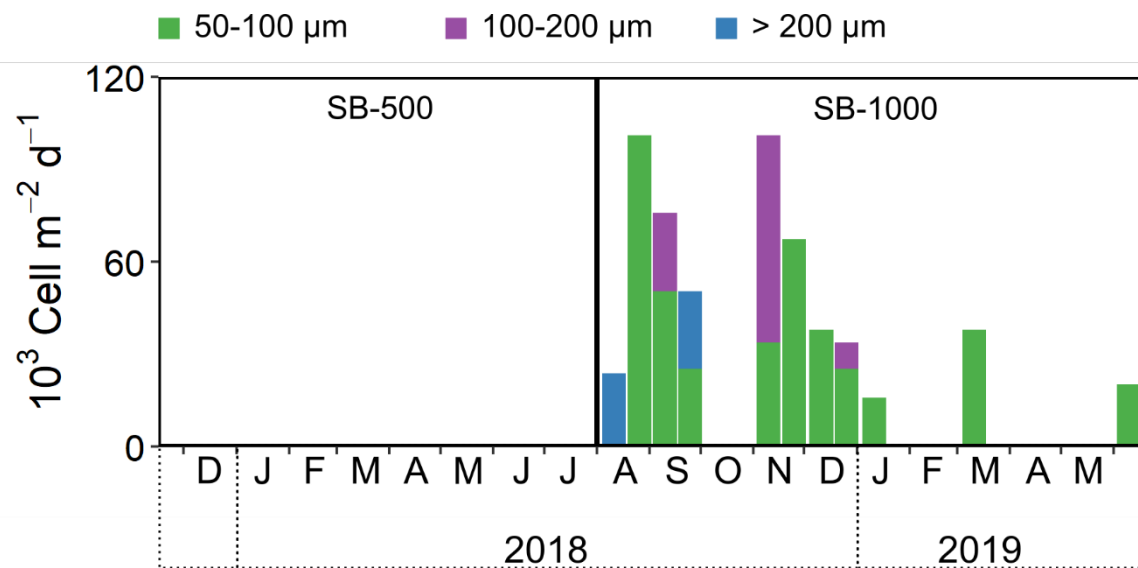

Figure S2 The fecal pellet fluxes in sinking particles from SB-500 and SB-1000 sediment traps.
